# Supplementary material for: The Prognostic Value of Neutrophil-to-Lymphocyte Ratio in Patients with Metastatic Renal Cell Carcinoma
Source: MDPI journal article supplement (doi:10.3390/curroncol30020187), 2023-02-17
Supplement: s1 [file s1]

|           |   | All<br>n(%)                                         | Patient who<br>died | Not died         | Log-Rank<br>P value |  |
|-----------|---|-----------------------------------------------------|---------------------|------------------|---------------------|--|
|           |   | median survival (IQR)<br>mean survival ± SD (range) |                     |                  |                     |  |
| Gender    | M | 52(70.3)                                            | M 16(30.8)          | M 36(69.2)       | 0.355               |  |
|           |   | 8(5-14.50)                                          | 4.50(3-8)           | 11(6-23.75)      |                     |  |
|           |   | 13.85±16.79                                         | 5.50±3.28           | 17.56±18.98      |                     |  |
|           |   | (1-84)                                              | (1-13)              | (3-84)           |                     |  |
|           | F | 22(29.7)                                            | F 5(29.7)           | F 17(77.3)       |                     |  |
|           |   | 12.50(5-22.50)                                      | 5.00(2.50-24.50)    | 13(7.50-23)      |                     |  |
|           |   | 14.95±10.06                                         | 11.80±11.90         | 15.88±9.66       |                     |  |
|           |   | (2-36)                                              | (2-28)              | (3-36)           |                     |  |
|           |   | 0.774                                               | 0.304               | 0.734            |                     |  |
|           |   |                                                     |                     |                  |                     |  |
| Location  | S | 34(45.9)                                            | S 11(32.4)          | S 23(67.6)       | 0.352               |  |
|           |   | 8(4-15.25)                                          | 4(3-8)              | 12(5-20)         |                     |  |
|           |   | 13.91±17.99                                         | 4.91±3.47           | 18.22±20.50      |                     |  |
|           |   | (1-84)                                              | (1-13)              | (3-84)           |                     |  |
|           | D | 40(54.1)                                            | D 10(25.0)          | D 30(75.0)       |                     |  |
|           |   | 11(5.25-22.75)                                      | 5.50(3-13.50)       | 11.50(6-24)      |                     |  |
|           |   | 14.40±12.24                                         | 9.30±8.55           | 16.10±12.92      |                     |  |
|           |   | (3-60)                                              | 3-28                | (3-60)           |                     |  |
|           |   | 0.891                                               | 0.157               | 0.648            |                     |  |
|           |   |                                                     |                     |                  |                     |  |
| Fuhrman   | 2 | 2 35(47.3)                                          | 2 7(20.0)           | 2 28(80.0)       | 0.085               |  |
|           |   | 9(5-24)                                             | 6(3-8)              | 17.50(6-24)      |                     |  |
|           |   | 14.34±13.87                                         | 8.71±8.75           | 15.75±14.66      |                     |  |
|           |   | (3-72)                                              | (3-28)              | (3-72)           |                     |  |
|           | 3 | 37(41.9)                                            | 3 sau 4 14(37.8)    | 3 sau 4 23(62.2) |                     |  |
|           |   | 11(4-18)                                            | 4(3-8.75)           | 13(6-20)         |                     |  |
|           | 4 | 13.84±16.57                                         | 6.14±5.47           | 18.52±19.26      |                     |  |
|           |   | (1-84)                                              | (1-21)              | (3-84)           |                     |  |
|           |   | 0.889                                               | 0.496               | 0.573            |                     |  |
|           |   |                                                     |                     |                  |                     |  |
| Karnofsky | 0 | 57(77.0)                                            | 9(15.8)             | 48(84.2)         | 0.000               |  |
|           |   | 12(6-21.50)                                         | 8(4-12)             | 12(6.25-23.75)   |                     |  |
|           |   | 16.37±15.92                                         | 8.89±5.64           | 17.77±16.85      |                     |  |
|           |   | (3-84)                                              | (3-21)              | (3-84)           |                     |  |
|           | 1 | 17(23.0)                                            | 12(70.6)            | 5(29.4)          |                     |  |
|           |   | 4(3-5.50)                                           | 3.50(3-5)           | 5(4-18)          |                     |  |
|           |   | 6.82±8.46                                           | 5.58±7.19           | 9.80±11.34       |                     |  |
|           |   | (1-30)                                              | (1-28)              | (3-30)           |                     |  |
|           |   | 0.021                                               | 0.269               | 0.308            |                     |  |
|           |   |                                                     |                     |                  |                     |  |

|          |   |                  |                 |                    |       |                                                                                       |
|----------|---|------------------|-----------------|--------------------|-------|---------------------------------------------------------------------------------------|
| TTD      | 0 | 22(29.7)         | 2(9.1)          | 20(90.9)           | 0.009 | 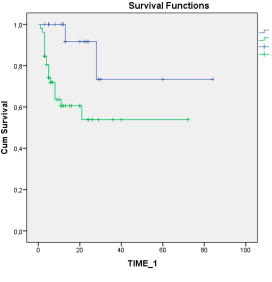   |
|          |   | 13(7.25-25)      | 20.50(13-20.50) | 12.50(5.75-23.75)  |       |                                                                                       |
|          |   | 19.86±19.17      | 20.50±10.60     | 19.80±20.01        |       |                                                                                       |
|          | 1 | (3-84)           | (13-28)         | (3-84)             |       |                                                                                       |
|          |   | 52(70.3)         | 19(36.5)        | 33(63.5)           |       |                                                                                       |
|          |   | 7.50(4-14.50)    | 4(3-8)          | 11(6-22)           |       |                                                                                       |
|          |   | 11.77±12.36      | 5.58±4.50       | 15.33±14.02        |       |                                                                                       |
| Calcium  | 0 | (1-72)           | (1-21)          | (3-72)             | 0.595 |    |
|          |   | 0.034            | 0.001           | 0.344              |       |                                                                                       |
|          | 1 | 58(78.4)         | 15(25.9)        | 43(74.1)           |       |                                                                                       |
|          |   | 9.50(5-17)       | 4.00(3-8)       | 11.00(6-20)        |       |                                                                                       |
|          |   | 13.78±15.76      | 7.33±7.56       | 16.02±17.27        |       |                                                                                       |
|          |   | (1-84)           | (1-28)          | (3-84)             |       |                                                                                       |
| HB       | 0 | 16(21.6)         | 6(37.5)         | 10(62.5)           | 0.002 |   |
|          |   | 12.50(5-24)      | 5.00(3-9.25)    | 24.00(10.20-31.50) |       |                                                                                       |
|          |   | 15.63±12.44      | 6.17±3.81       | 21.30±12.42        |       |                                                                                       |
|          | 1 | (3-40)           | (3-13)          | (3-40)             |       |                                                                                       |
|          |   | 0.667            | 0.066           | 0.004              |       |                                                                                       |
|          |   | 33(44.6)         | 7(21.2)         | 26(78.8)           |       |                                                                                       |
|          |   | 12(8-26)         | 8(4-21)         | 12.50(10.75-29.00) |       |                                                                                       |
| LDH      | 0 | 19.67±19.52      | 11.00±9.62      | 22.00±20.94        | 0.002 |  |
|          |   | (3-84)           | (3-28)          | (3-84)             |       |                                                                                       |
|          | 1 | 41(55.4)         | 14(34.1)        | 27(65.9)           |       |                                                                                       |
|          |   | 6(4-13)          | 3.50(3.00-6.50) | 8(5-22)            |       |                                                                                       |
|          |   | 9.76±7.98        | 5.00±3.46       | 12.22±8.57         |       |                                                                                       |
|          |   | (1-30)           | (1-13)          | (3-30)             |       |                                                                                       |
|          |   | 0.009            | 0.048           | 0.034              |       |                                                                                       |
| Platlets | 0 | 62(83.8)         | 14(22.6)        | 48(77.4)           | 0.075 |  |
|          |   | 11(5-22.25)      | 5(3-8)          | 12(6-24)           |       |                                                                                       |
|          |   | 15.40±15.98      | 7.00±6.57       | 17.85±17.10        |       |                                                                                       |
|          | 1 | (2-84)           | (2-28)          | (3-84)             |       |                                                                                       |
|          |   | 12(16.2)         | 7(58.3)         | 5(41.7)            |       |                                                                                       |
|          |   | 5.50(3.25-12.75) | 4(3-13)         | 9(5.50-12.50)      |       |                                                                                       |
|          |   | 7.83±5.87        | 7.00±7.28       | 9.00±3.53          |       |                                                                                       |
| Platlets | 0 | (1-21)           | (1-21)          | (5-13)             | 0.075 |  |
|          |   | 0.084            | 1.000           | 0.257              |       |                                                                                       |
|          | 1 | 50(67.6)         | 12(24.0)        | 38(76.0)           |       |                                                                                       |
|          |   | 11(5-22.25)      | 5(3.25-8)       | 12.50(6-24)        |       |                                                                                       |
|          |   | 15.96±15.96      | 8.17±7.96       | 18.42±17.10        |       |                                                                                       |
|          |   | (3-84)           | (3-28)          | (3-84)             |       |                                                                                       |
|          | 1 | 24(32.4)         | 9(37.5)         | 15(62.5)           |       |                                                                                       |
|          |   | 6.50(3-12)       | 3(2.50-9.50)    | 8(4-20)            |       |                                                                                       |
|          |   | 10.46±12.44      | 5.44±4.24       | 13.47±14.77        |       |                                                                                       |
|          |   | (1-60)           | (1-13)          | (3-60)             |       |                                                                                       |

|                         |       |                   |               |                  |       |                                                                                       |
|-------------------------|-------|-------------------|---------------|------------------|-------|---------------------------------------------------------------------------------------|
| neutrophil<br>NA 1(1.4) | 0     | 0.142             | 0.365         | 0.329            | 0.102 | 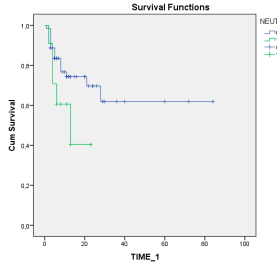   |
|                         |       | 62(83.8)          | 16(25.8)      | 46(74.2)         |       |                                                                                       |
|                         |       | 11(5-21.25)       | 5(3-8)        | 12(6-24)         |       |                                                                                       |
|                         | 1     | 15.23±16.06       | 7.38±7.29     | 17.96±17.38      |       |                                                                                       |
|                         |       | (1-84)            | (1-28)        | (3-84)           |       |                                                                                       |
|                         |       | 11(14.9)          | 5(45.5)       | 6(54.5)          |       |                                                                                       |
|                         |       | 6(4-13)           | 4(3-9.50)     | 9.50(5.25-15.50) |       |                                                                                       |
|                         |       | 8.45±6.19         | 5.80±4.27     | 10.67±7.01       |       |                                                                                       |
|                         |       | (2-23)            | (2-13)        | (1-23)           |       |                                                                                       |
|                         |       | 0.174             | 0.655         | 0.318            |       |                                                                                       |
| NLR<br>NA 1(1.4)        | <3    | 45(61.6)          | 9(20.0)       | 36(80.0)         | 0.001 |    |
|                         |       | 13(7-24)          | 8(4-16)       | 15.50(10.25-24)  |       |                                                                                       |
|                         |       | 18.87±17.26       | 10.22±8.67    | 21.03±18.26      |       |                                                                                       |
|                         | >=3   | (3-84)            | (3-28)        | (3-84)           |       |                                                                                       |
|                         |       | 28(38.4)          | 12(42.9)      | 16(57.1)         |       |                                                                                       |
|                         |       | 5(3-8)            | 3.50(3-5.75)  | 6(5-11)          |       |                                                                                       |
|                         |       | 6.71±5.68         | 4.58±3.23     | 8.31±6.64        |       |                                                                                       |
|                         |       | (1-30)            | (1-13)        | (3-30)           |       |                                                                                       |
|                         |       | 0.000             | 0.058         | 0.001            |       |                                                                                       |
|                         |       | 0.000             | 0.058         | 0.001            |       |                                                                                       |
| IMDC                    | fav.  | 5(6.8)            | -             | 5(100)           | 0.000 |   |
|                         |       | 13(12-56.50)      | -             | 13(12-56.50)     |       |                                                                                       |
|                         |       | 30.00±31.04       | -             | 30.00±31.04      |       |                                                                                       |
|                         | inter | (12-84)           | -             | (12-84)          |       |                                                                                       |
|                         |       | 38(51.4)          | 6(15.8)       | 32(84.2)         |       |                                                                                       |
|                         |       | 11.50(7.50-22.25) | 8(6.75-22.75) | 12(6.75-22.75)   |       |                                                                                       |
|                         | poor  | 17.13±14.88       | 12.67±9.62    | 17.97±15.65      |       |                                                                                       |
|                         |       | (3-72)            | (3-28)        | (3-72)           |       |                                                                                       |
|                         |       | 31(41.9)          | 15(48.4)      | 16(51.6)         |       |                                                                                       |
|                         |       | 5(3-11)           | 4(3-5)        | 6.50(4.25-21.25) |       |                                                                                       |
| MSKCC                   | low   | 8±7.56            | 4.73±3.24     | 11.06±9.16       | 0.000 |  |
|                         |       | (1-30)            | (1-13)        | (3-50)           |       |                                                                                       |
|                         |       | 0.002             | 0.009         | 0.068            |       |                                                                                       |
|                         | inter | 8(10.8)           | -             | 8(100)           |       |                                                                                       |
|                         |       | 13(12-52.25)      | -             | 13(12-52.25)     |       |                                                                                       |
|                         |       | 29.25±27.77       | -             | 29.25±27.77      |       |                                                                                       |
|                         | high  | (11-84)           | -             | (11-84)          |       |                                                                                       |
|                         |       | 49(66.2)          | 9(18.4)       | 40(81.6)         |       |                                                                                       |
|                         |       | 11(5-20.50)       | 8(4-16)       | 11(5.25-21.50)   |       |                                                                                       |
|                         |       | 13.98±12.54       | 10.56±8.50    | 14.75±13.25      |       |                                                                                       |
|                         |       | (3-72)            | (3-28)        | (3-72)           |       |                                                                                       |
|                         |       | 17(23.0)          | 12(70.6)      | 5(29.4)          |       |                                                                                       |
|                         |       | 5(3-9.50)         | 3.50(3-5)     | 13(5.50-27)      |       |                                                                                       |
|                         |       | 7.65±8.06         | 4.33±3.05     | 15.60±11.05      |       |                                                                                       |
|                         |       | (1-30)            | (1-13)        | (5-30)           |       |                                                                                       |
|                         |       | 0.003             | 0.029         | 0.072            |       |                                                                                       |

|                        |      |                   |                  |                   |       |  |
|------------------------|------|-------------------|------------------|-------------------|-------|--|
| Therapy                | Niv  | 6(8.1)            | 6                | 2                 | 0.000 |  |
|                        | +Ip  | 3.50(1.75-4.50)   | 2.50(1.25-3.75)  | 5(4-5)            |       |  |
|                        |      | 3.33±1.75         | 2.50±1.29        | 5.00±1.41         |       |  |
|                        |      | (1-6)             | (1-4)            | (4-6)             |       |  |
|                        | Sun  | 39(52.7)          | 11               | 28                |       |  |
|                        |      | 12(6-22)          | 6(4-11)          | 12.50(11-24)      |       |  |
|                        |      | 17.41±18.05       | 7.91±5.39        | 21.14±19.91       |       |  |
|                        |      | (3-84)            | (3-21)           | (3-84)            |       |  |
|                        | Paz  | 28(37.8)          | 6                | 22                |       |  |
|                        |      | 7.50(5-19)        | 4(3-13)          | 10.50(5-21)       |       |  |
| MPUL<br>NA<br>45(60.8) | 0    | 17(23.0)          | 8(47.1)          | 9(52.9)           | 0.571 |  |
|                        |      | 11(6.50-26)       | 8(3.50-18.50)    | 20(9.50-29)       |       |  |
|                        |      | 15.35±10.19       | 10.88±9.03       | 19.33±9.92        |       |  |
|                        |      | (3-30)            | (3-28)           | (3-30)            |       |  |
|                        | 1    | 12(16.2)          | 2(16.7)          | 10(83.3)          |       |  |
|                        |      | 5.50(4.25-12.25)  | 8                | 5.50(4.75-10.75)  |       |  |
|                        |      | 8.17±6.08         | 8.00±7.07        | 8.20±6.30         |       |  |
|                        |      | (3-24)            | (3-13)           | (3-24)            |       |  |
|                        |      | 0.025             | 0.691            | 0.009             |       |  |
|                        |      |                   |                  |                   |       |  |
| MLYM<br>NA<br>45(60.8) | 0    | 10(13.5)          | 2(20.0)          | 8(80.0)           | 0.197 |  |
|                        |      | 16.50(6.50-21.75) | 12               | 16.50(7.75-23)    |       |  |
|                        |      | 15.30±8.99        | 12.00±12.72      | 16.13±8.77        |       |  |
|                        |      | (3-30)            | (3-21)           | (5-30)            |       |  |
|                        | 1    | 19(25.7)          | 8(42.1)          | 11(57.9)          |       |  |
|                        |      | 8(4-13)           | 8(3.50-12.50)    | 6(4-24)           |       |  |
|                        |      | 10.84±9.35        | 9.88±8.14        | 11.55±10.47       |       |  |
|                        |      | (3-29)            | (3-28)           | (3-29)            |       |  |
|                        |      | 0.227             | 0.769            | 0.316             |       |  |
|                        |      |                   |                  |                   |       |  |
| MHEP<br>NA<br>45(60.8) | 0    | 29(39.2)          | 10               | 19                | 0.335 |  |
|                        |      | 8(5-20.50)        | 8(3-15)          | 10(5-24)          |       |  |
|                        |      | 12.38±9.32        | 10.30±8.39       | 13.47±9.81        |       |  |
|                        |      | (3-30)            | (3-28)           | (3-30)            |       |  |
|                        | MOSS | 21(28.4)          | 6(28.6)          | 15                |       |  |
|                        |      | 8(5-22)           | 9.50(6.75-16.75) | 8(5-24)           |       |  |
|                        |      | 12.38±9.26        | 11.83±8.61       | 12.60±9.79        |       |  |
|                        |      | (3-29)            | (3-28)           | (3-29)            |       |  |
|                        | 1    | 8(10.8)           | 4                | 4                 |       |  |
|                        |      | 8.50(3.50-20.75)  | 4(3-17)          | 15.50(7.25-27.50) |       |  |
| MOTH                   |      | 12.38±10.11       | 8.00±8.71        | 16.75±10.56       |       |  |
|                        |      | (3-30)            | (3-21)           | (6-30)            |       |  |
|                        |      | 0.999             | 0.512            | 0.514             |       |  |
|                        |      | 0 28(37.8)        |                  |                   |       |  |

---

1 1(1.4)  
NA 45(60.8)

---
